# Supplementary material for: Nrf2 activation through the PI3K/GSK-3 axis protects neuronal cells from Aβ-mediated oxidative and metabolic damage
Source: PubMed Central journal article supplement (PMC6958642; doi:10.1186/s13195-019-0578-9), 2020-01-13
Supplement: 13195_2019_578_MOESM3_ESM.pdf [file 13195_2019_578_MOESM3_ESM.pdf]

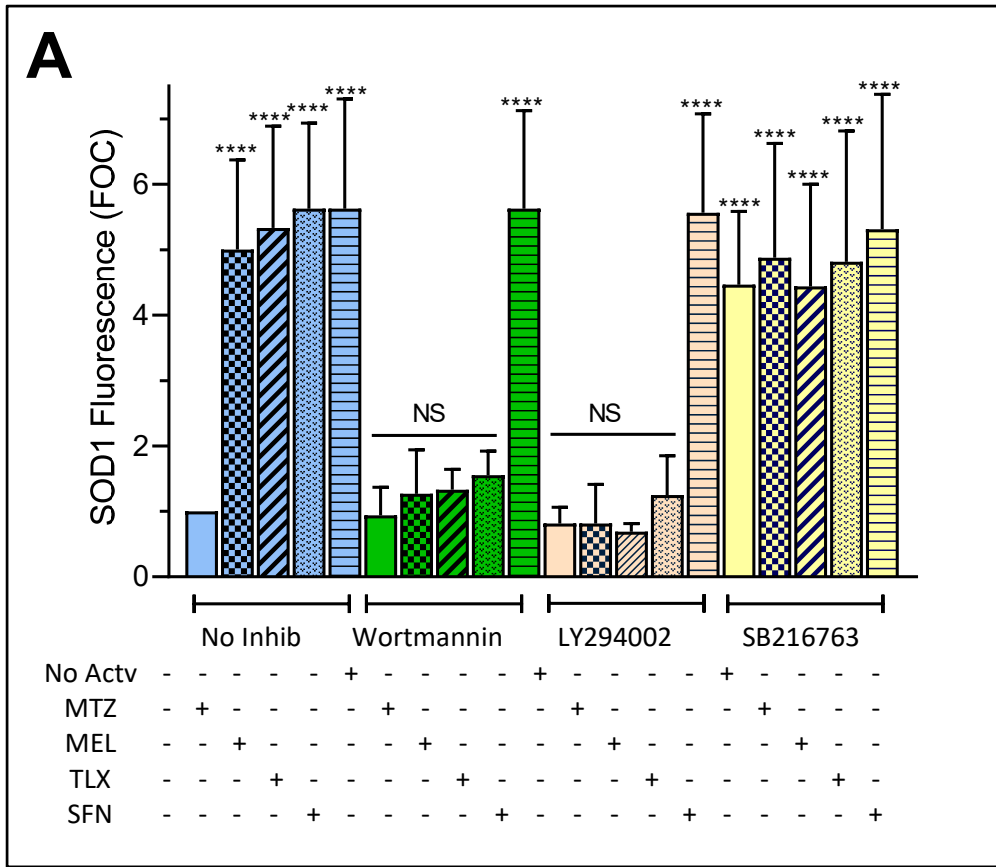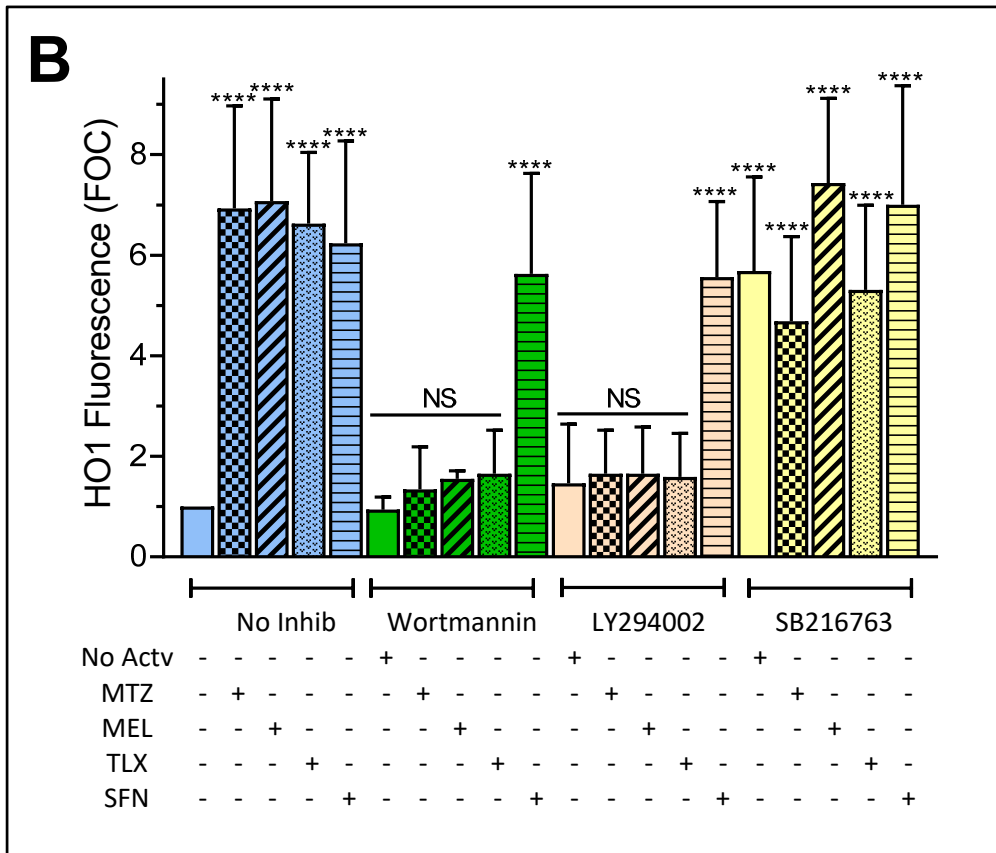

Supplementary Figure 3
